# Supplementary material for: Arsenic Exposure and Cell-Mediated Immunity in Pre-School Children in Rural Bangladesh
Source: Oxford University Press journal article supplement (doi:10.1093/toxsci/kfu113), 2014-06-13
Supplement: kfu113_Supplementary_Data.zip [file kfu113_Supplementary_Data.zip]

Archive with 2 entries (2 files):
- toxsci-14-0233-File006.pdf
- toxsci-14-0233-File005.doc
