# Supplementary material for: Arsenic Exposure and Cell-Mediated Immunity in Pre-School Children in Rural Bangladesh
Source: Oxford University Press journal article supplement (doi:10.1093/toxsci/kfu113), 2014-06-13
Supplement: kfu113_Supplementary_Data.zip [file kfu113_Supplementary_Data.zip › toxsci-14-0233-File006.pdf]

Supplementary Figure 1: Response to the PPD skin test in children at 4.5 years of age in relation to pre- and postnatal arsenic exposure

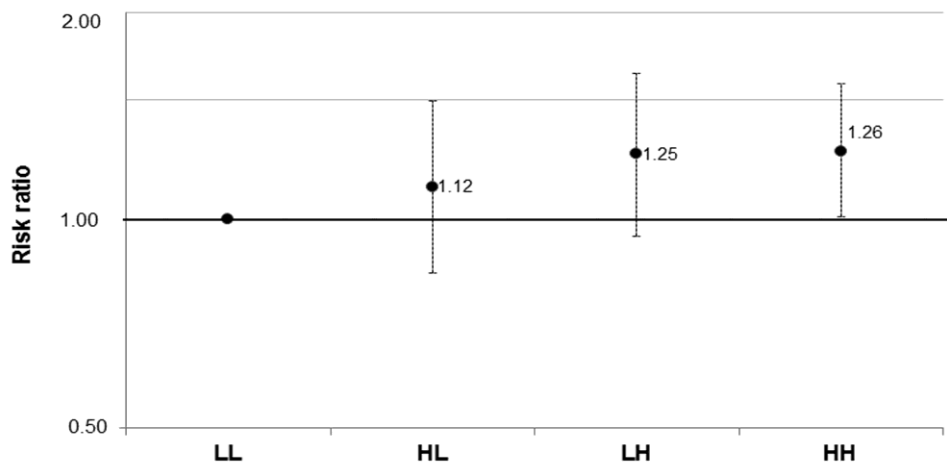

Data show risk ratio, with 95% confidence interval, for not responding to PPD (induration size < 5 mm) in relation to high (H) or low (L) (above/below median concentration) prenatal exposure combined with high/low childhood exposure. The associations were adjusted for children's age, gender, and SES.
